# Supplementary material for: Scaling Up Pro-Poor Agrobiodiversity Interventions as a Development Option
Source: MDPI journal article supplement (doi:10.3390/su151310526), 2023-07-04
Supplement: s1 [file s1]

**Table S1.** Lists of interventions for the crop and the livestock sectors

| <b>Interventions Crop</b>                                                                | <b>Interventions Livestock</b>                                                                                   |
|------------------------------------------------------------------------------------------|------------------------------------------------------------------------------------------------------------------|
| <b>Improving availability of materials</b>                                               | <b>Improving availability of materials</b>                                                                       |
| Reintroduction of materials from ex situ collections                                     | Introduction of semen and/or live animals from ex situ in vivo programmes (e.g. nucleus herds)                   |
| Reintroduction of materials from similar environments                                    | Introduction of animal genetic resources from similar environments                                               |
| Seed Cooperative for collection, distribution, and multiplication of seeds               | Community-based livestock management                                                                             |
| Community Seed Bank                                                                      | Livestock fairs, exhibitions, and shows/agricultural fairs                                                       |
| Community Gene bank                                                                      | Reduce transportation costs of traditional breeds to farmer communities                                          |
| Community managed nurseries                                                              | Cross- and/or pilot-site visits for farmers and local extension workers                                          |
| Diversity Field Fora (DFF) & Diversity Field School (DFS)                                | Microfinance or credit schemes to enable purchase of local materials                                             |
| Diversity Kit                                                                            | Support the use of local breeds in nucleus herds                                                                 |
| Diversity Fairs                                                                          | Introduction of semen/embryos and other genetic materials from ex situ conservation (NO in vivo)                 |
| Seed vouchers                                                                            |                                                                                                                  |
| Reduce transportation costs of traditional variety material closer to farmer communities |                                                                                                                  |
| Cross site visits for farmers and local extension workers                                |                                                                                                                  |
| Microfinance or credit schemes to enable purchase of local materials                     |                                                                                                                  |
| <b>Improving information and availability of information</b>                             | <b>Improving information and availability of information</b>                                                     |
| On-farm Diversity blocks                                                                 | Trials comparing traditional and modern breeds                                                                   |
| Field or Laboratory trials comparing traditional and modern varieties                    | Community Biodiversity Registries. Livestock registries/herd books                                               |
| Community Biodiversity Registries                                                        | Literacy training particularly for poor and vulnerable groups                                                    |
| Literacy training particularly for poor and vulnerable groups                            | Breeds information data bases made in farmer friendly format / Establish registries of local and native breeds.  |
| Variety information data bases made in farmer friendly formats                           | Setting up information systems and internet connections for farmer access to information                         |
| Setting up information systems and internet connections for farmer access to information | Rural radio programs on the importance of crop and livestock diversity                                           |
| Small weather stations that can be linked to internet sites                              | Drama, music, and poetry traveling shows that have agrobiodiversity as theme                                     |
| Rural radio program that includes talks on the importance of crop biodiversity           | Painting and art competitions that reward farmer groups for knowledge and descriptions of agricultural diversity |

|                                                                                                                                             |                                                                                                                             |
|---------------------------------------------------------------------------------------------------------------------------------------------|-----------------------------------------------------------------------------------------------------------------------------|
| Drama, music and poetry traveling shows that have crop biodiversity as the theme                                                            |                                                                                                                             |
| Painting and art competitions that reward farmer groups for knowledge and descriptions of agricultural diversity                            |                                                                                                                             |
| <b>Improving traditional variety materials and their management</b>                                                                         | <b>Improving traditional breed materials and their management</b>                                                           |
| Participatory crop improvement (Grassroots breeding; Participatory Plant Breeding; Participatory Varietal Selection, Evolutionary breeding) | Improved breeding strategies                                                                                                |
| Using genomics to improve in situ crop populations                                                                                          | Conserving and using breeds with high genetic variation within the breed                                                    |
| Changing the formal breeding institutions to increase the use of farmer selection materials and traditional varieties in their programs     | Breeding programs for breeds with small population sizes                                                                    |
| Planting of intra-specific mixtures to reduce pests and diseases                                                                            | Promote in situ conservation programmes to conserve, improve and use local AnGR                                             |
| Improve seed storage facilities and methods                                                                                                 | Identify, reinforce and/or establish artificial insemination infrastructures, including breeding cooperatives and companies |
| Seed cleaning/seed treatment                                                                                                                | Micro credit facilities to set up technical activities particularly for rural men and women                                 |
|                                                                                                                                             | Strengthen and/or establish farmers' and livestock keepers' associations and breed societies                                |
|                                                                                                                                             | Community based breeding program, animal identification and pedigree recording                                              |
|                                                                                                                                             | Improved strategies of management and raising practices                                                                     |
| <b>Improved Processing</b>                                                                                                                  | <b>Improved Processing</b>                                                                                                  |
| Shift retailers to use different processing equipment that can use diversified materials                                                    | Improve processing animal-derived products                                                                                  |
| Training of producers in improved processing                                                                                                |                                                                                                                             |
| <b>Alternatives and modification to seed certification systems</b>                                                                          | <b>Alternatives to Certification schemes relevant to Livestock</b>                                                          |
| Plant varieties common knowledge (VCK)                                                                                                      | Geographic Indications                                                                                                      |
| Registration and release of farmers' varieties with acceptance of enhanced bulk varieties                                                   |                                                                                                                             |
| Geographic Indications                                                                                                                      |                                                                                                                             |
| Quality declared seed (QDS) - that certify the vendor rather than the seed                                                                  |                                                                                                                             |
| Truthfully labeled seed Laws that focus on seed quality rather than seed purity                                                             |                                                                                                                             |
| Registries of native crops                                                                                                                  |                                                                                                                             |
| Links between intellectual property rights protection and benefit-sharing                                                                   |                                                                                                                             |

|                                                                                                                                                                                |                                                                                                                                                                           |
|--------------------------------------------------------------------------------------------------------------------------------------------------------------------------------|---------------------------------------------------------------------------------------------------------------------------------------------------------------------------|
| Plant variety protection systems adapted to farmers varieties                                                                                                                  |                                                                                                                                                                           |
| Benefit sharing to farmer communities for traditional variety access and use                                                                                                   |                                                                                                                                                                           |
| Participatory guarantee system                                                                                                                                                 |                                                                                                                                                                           |
| <b>Market creation and market promotion</b>                                                                                                                                    | <b>Market creation and Market promotion</b>                                                                                                                               |
| Market promotion through taxes and subsidies                                                                                                                                   | Market promotion through taxes and subsidies                                                                                                                              |
| Market creation for traditional varieties or products from traditional varieties including niche markets                                                                       | Market creation for traditional varieties and breeds or products from traditional varieties and breeds including niche markets                                            |
| Education and financial support to farmers' groups to develop a marketing strategy                                                                                             | Education and financial support to farmers' groups to develop a marketing strategy                                                                                        |
| Micro credit facilities to set up small businesses particularly for rural men and women                                                                                        | Micro credit facilities to set up small businesses particularly for rural men and women                                                                                   |
| Advertisement campaigns to improve consumer and retailer awareness of important traits (nutritional, adaptive)                                                                 | Advertisement campaigns to improve consumer and retailer awareness of important traits (nutritional, adaptive)                                                            |
| Cookbooks with traditional recipes; gardening books that promote traditional varieties for particular management practices                                                     | Cookbooks with traditional recipes; gardening books that promote traditional varieties for particular management practices                                                |
| Fair trade price premiums - Eco-labeling (paying the full production value through price premiums)                                                                             | Fair trade price premiums - Eco-labeling (paying the full production value through price premiums)                                                                        |
| Reduction of transportation costs for crop products                                                                                                                            | Reduction of transportation costs for livestock products                                                                                                                  |
| Organization of meetings involving value-chain and market-chain actors to discuss how to enhance market potential.                                                             |                                                                                                                                                                           |
| <b>Building Partnerships and Trust</b>                                                                                                                                         | <b>Building Partnerships and Trust</b>                                                                                                                                    |
| Private and public partnership for the construction of small infrastructure for the production of a better-quality product                                                     | Private and public partnership for the construction of small infrastructure for the production of a better-quality product                                                |
| Strengthened and cooperative extension service that includes farmers, are more demand driven or establishment of new farmer-governed local institutions                        | Strengthened cooperative extension service that includes farmers, are more demand driven or establishment of new farmer-governed local institutions                       |
|                                                                                                                                                                                | Organization of meetings involving value-chain and market-chain actors to discuss how to enhance market potential                                                         |
| <b>Changing norms</b>                                                                                                                                                          | <b>Changing norms</b>                                                                                                                                                     |
| Advertising and social campaigns that promote better adapted varieties that reduce need for chemical inputs to change social norms such as nutritional cultural values of food | Advertising and social campaigns that promote better locally adapted breeds for which fewer external inputs are required (e.g. vaccines, medicine, feed)                  |
| Academic curricula include traditional crop varieties as an agricultural resource and ecosystem service                                                                        | Academic biology curriculum includes traditional crop varieties and local breeds as valuable agricultural resource and contributors to the delivery of ecosystem services |

|                                                                                                                       |                                                                                                                         |
|-----------------------------------------------------------------------------------------------------------------------|-------------------------------------------------------------------------------------------------------------------------|
| Gender sensitive response policy                                                                                      | Gender and youth sensitive response policy                                                                              |
| Strengthen and/or establish training programmes and extension services that include intra-specific diversity          | Strengthen and/or establish training programmes and extension services that include intra-specific diversity            |
|                                                                                                                       | Improve links between intellectual property rights and benefit-sharing in livestock                                     |
| <b>Promoting ecological land management practices</b>                                                                 | <b>Promoting ecological land management practices</b>                                                                   |
| Environmentally sensitive areas (ESA) include high agrobiodiversity areas                                             | Environmentally sensitive areas (ESA) include high agrobiodiversity areas                                               |
| Establish and/or strengthen the management of Agrobiodiversity Zones                                                  | Establish and/or strengthen the management of Agrobiodiversity Zones                                                    |
| Agrobiodiversity Ecotourism                                                                                           | Support and regulate Agrobiodiversity Ecotourism                                                                        |
| Organic farming and organic seed breeding with traditional variety used as planting materials                         | Organic farming with local breeds                                                                                       |
| Investment in agricultural research that includes the use of agricultural biodiversity within the production system   | Investment in agricultural research that includes the use of agricultural agrobiodiversity within the production system |
| Agricultural biodiversity included in Environmental Impact Assessment of individual projects, policies and programmes | Agrobiodiversity included in Environmental Impact Assessment of individual projects, policies and programmes            |
| <b>Payment schemes for ecosystem services</b>                                                                         | <b>Payment schemes for ecosystem services</b>                                                                           |
| Payment for Environmental Services (PES) schemes are established or reinforced                                        | Payment for Environmental Services (PES) schemes are established or reinforced                                          |
| Linking upstream and downstream communities                                                                           | Linking upstream and downstream communities                                                                             |
| Sharing of monetary benefits                                                                                          | Sharing of monetary benefits                                                                                            |
|                                                                                                                       | Payment schemes for the conservation of locally important breeds are established or reinforced                          |

**Table S2.** List of institutes/organizations by country which have collaborated in pro-poor agrobiodiversity assessments and interventions

| <b>COUNTRY</b> | <b>INSTITUTION/ORGANIZATION</b>                                                                   |
|----------------|---------------------------------------------------------------------------------------------------|
| Algeria        | Institut National de la Recherche Agronomique (INRAA);                                            |
| Armenia        | Armenian Agrarian University                                                                      |
| Armenia        | Armenian Forest NGO                                                                               |
| Armenia        | Env Public Alliance NGO                                                                           |
| Armenia        | Institute of Botany of Academy of Sciences                                                        |
| Armenia        | Ministry of Nature Protection of the Republic of Armenia                                          |
| Bhutan         | National Biodiversity Centre (NBC), BHUTAN                                                        |
| Bolivia        | Fundación para la Promoción e Investigación de Productos Andinos (PROINPA)                        |
| Burkina Faso   | Centre National de la Recherche Scientifique et Technologique (CNRST)                             |
| Burkina Faso   | Federation de Unions des Groupements Naam (FUGN)                                                  |
| Burkina Faso   | Institut de l'Environnement et de Recherches Agricoles (INERA)                                    |
| Burkina Faso   | University of Ouagadougou                                                                         |
| Burundi        | Gitega, Muramvya, Mwaro, and Bujumbura Provincial Offices.                                        |
| China          | Chinese Academy of Agricultural Sciences (CAAS)                                                   |
| China          | Chinese Academy of Tropical Agricultural Sciences, Hainan                                         |
| China          | Guizhou Academy of Agricultural Sciences                                                          |
| China          | Kunming Institute of Botany                                                                       |
| China          | Minzhu University of China                                                                        |
| China          | Sichuan Academy of Agricultural Sciences (SAAS)                                                   |
| China          | Yunnan Academy of Agricultural Sciences (YAAS)                                                    |
| China          | Yunnan Agricultural University (YAU)                                                              |
| Cuba           | Instituto de Investigaciones Fundamentales en Agricultura Tropical (INIFAT)                       |
| Ecuador        | Facultad de Ciencias Agrícolas, Universidad Central del Ecuador                                   |
| Ecuador        | Instituto Nacional de Investigaciones Agropecuarias (INIAP)                                       |
| Ecuador        | Universidad Técnica Estatal de Quevedo (UTEQ)                                                     |
| Egypt          | Academy of Scientific Research and Technology (ASRT)                                              |
| Ethiopia       | Addis Ababa University                                                                            |
| Ethiopia       | Ethiopian Biodiversity Institute (EBI)                                                            |
| Ethiopia       | Institute of Biodiversity Conservation and Research                                               |
| Ethiopia       | Mekelle University                                                                                |
| France         | Institut de Recherche pour le Développement (IRD)                                                 |
| France         | Institut National d'Etudes Supérieures Agronomiques de Montpellier                                |
| Hungary        | Institute of Agrobotany                                                                           |
| Hungary        | Szent István Egyetem, Környezetgazdálkodási Intézet, Hungary                                      |
| India          | Indian Council of Agricultural Research (ICAR), New Delhi                                         |
| Indonesia      | Indonesian Centre for Horticulture Research and Development (ICHORD), Jakarta                     |
| Iran           | Center for Sustainable Development and Environment (CENESTA), IRAN                                |
| Italy          | Department of Environmental Biology, Università degli Studi "La Sapienza" di Roma, Italy          |
| Jordan         | National Center for Agricultural Research and Extension (NCARE), JORDAN                           |
| Kazakhstan     | Farmers' Foundation in Kazakhstan,                                                                |
| Kazakhstan     | National Agrarian University in Kazakhstan                                                        |
| Kyrgyzstan     | Forestry Institute in Kyrgyzstan                                                                  |
| Kyrgyzstan     | Innovation Centre of Phytotechnologies of the National Academy of Sciences of the Kyrgyz Republic |

|            |                                                                                                  |
|------------|--------------------------------------------------------------------------------------------------|
| Kyrgyzstan | National Agrarian University in Kyrgyzstan                                                       |
| Kyrgyzstan | Research and Production Association 'Bogparvar                                                   |
| Malasia    | Malaysian Agricultural Research and Development Institute (MARDI), Kuala Lumpur                  |
| Malawi     | Programme for Rural Irrigation Development (PRIDE), s                                            |
| Malawi     | Phalombe, Machinga, Dowa, Mangochi and Karonga District Offices                                  |
| Mali       | Institut d'Economie Rurale                                                                       |
| Mexico     | CINVESTAV-IPN, Unidad Merida                                                                     |
| Mexico     | Colegio Postgraduados                                                                            |
| Mexico     | Ejido de Yaxcabá - Farmers' Union of Yaxcabá (NGO)                                               |
| Mexico     | Instituto Nacional de Antropología e Historia (INAH)                                             |
| Mexico     | Instituto Tecnológico Agropecuario (ITA) No. 2 of Conkal, Yucatan                                |
| Mexico     | Instituto Tecnológico de Mérida                                                                  |
| Mexico     | Tecnológico Nacional de México/ Instituto Tecnológico de Conkal                                  |
| Mexico     | Tecnológico Nacional de México/ Instituto Tecnológico de Tlalpan, Meixco                         |
| Mexico     | Universidad Autónoma Chapingo (UACH)                                                             |
| Morocco    | ADL: Association of Local Development (NGO)                                                      |
| Morocco    | ADRAR: Association of Local Development at Rich site. (NGO)                                      |
| Morocco    | DPA: Direction Provinciale de l'Agriculture                                                      |
| Morocco    | Ecole Nationale d'Agriculture (ENA)                                                              |
| Morocco    | Hassan II Institute of Agronomy and Veterinary Medicine (IAV)                                    |
| Morocco    | Institut National de la Recherche Agronomique (INRA)                                             |
| Morocco    | Moroccan Biodiversity and Livelihoods Association                                                |
| Morocco    | ORMVA: Regional Office of the Agriculture Section (for desert valley)                            |
| Nepal      | Anamolbiu (Local private seed company)                                                           |
| Nepal      | Animal Breeding Division, National Animal Science Research Institute                             |
| Nepal      | Department of Agriculture                                                                        |
| Nepal      | Local Initiatives for Biodiversity, Research and Development LI-BIRD (NGO)                       |
| Nepal      | Ministry of Agriculture                                                                          |
| Nepal      | National Agrobiodiversity Coordination Committee (NABC)                                          |
| Nepal      | National State Planning Commission                                                               |
| Nepal      | Nepal Agricultural Research Council (NARC)                                                       |
| Niger      | Institut National de la recherche Agronomique du Niger (INRAN)                                   |
| Peru       | Consortio para el Desarrollo Sostenible de Ucayali CODESU                                        |
| Peru       | Instituto Nacional de Investigaciones Agrarias INIA                                              |
| Sri Lanka  | Botanic Gardens, Dept of Wildlife Conservation,                                                  |
| Sri Lanka  | Dept of Agrarian Services, Dept of Animal Production & Health, Dept of Export Agriculture,       |
| Sri Lanka  | Ministry of Indigenous Medicine, Meteorological Dept. Ministry of Agriculture and Ministry of En |
| Sri Lanka  | Peradeniya Univeristy,                                                                           |
| Sri Lanka  | Ruhuna University, NGOs: Green Movement                                                          |
| Sri Lanka  | SSIP Sevalanka                                                                                   |
| Sri Lanka  | Wayamba Univeristy                                                                               |
| Syria      | Faculty of Agricultural, Tishreen University                                                     |
| Tajikistan | Horog State University, Tajikistan;                                                              |
| Tajikistan | Institute of Horticulture                                                                        |
| Tajikistan | Research and Production Association 'Bogparvar', Dushanbe                                        |
| Tanzania   | Vice President's Office of the United Republic of Tanzania                                       |
| Tanzania   | Magu, Mkalama, Nzega, Kondoa, Micheweni District Offices                                         |

|              |                                                                       |
|--------------|-----------------------------------------------------------------------|
| Thailand     | Department of Agriculture (DOA), Chatuchak, Bangkok                   |
| Tunisa       | Institution of Research and Agriculture's High Education (IRESA)      |
| Turkenistan  | National Institute of Deserts, Flora and Fauna in Turkmenistan        |
| Turkmenistan | Research Institute of Farming, Turkmenistan                           |
| Turkmenistan | Academy of Science Turkmenistan                                       |
| Turkmenistan | Centre on Plant Genetic Resources of Research Institute of Farming,   |
| Turkmenistan | Garrygala and the Academy of Sciences of Turkmenistan                 |
| Turkmenistan | Institute of Genetics and Plant Experimental Biology                  |
| Uganda       | Action Coalition for Development (ACODE)                              |
| Uganda       | Makarere University                                                   |
| Uganda       | National Agricultural Advisory services (NAADS)                       |
| Uganda       | National Agricultural research Organization (NARO)                    |
| Uganda       | National Environment Management Authority (NEMA)                      |
| Uganda       | Uganda National Council for Science and Technology                    |
| Uganda       | Uganda Seed Traders Association                                       |
| USA          | Washington State University, Pullman WA                               |
| Uzbekistan   | Centre of Agricultural Innovations of Farmers' Council of Uzbekistan  |
| Uzbekistan   | Farmers' Union in Uzbekistan,                                         |
| Uzbekistan   | Institute of Genetics and Plant Experimental Biology                  |
| Uzbekistan   | Mamun Academy Uzbekistan                                              |
| Uzbekistan   | Ministry of Agriculture of Uzbekistan                                 |
| Uzbekistan   | National Association of Farmers                                       |
| Uzbekistan   | Private agricultural enterprise "Albatross"                           |
| Uzbekistan   | Research Institute of Forestry in Uzbekistan                          |
| Uzbekistan   | Samarkand State University                                            |
| Uzbekistan   | Shreder Institute of Horticulture, Viticulture and Winemaking         |
| Uzbekistan   | Tashkent State Agrarian University                                    |
| Uzbekistan   | Uzbek Research Institute of Forestry                                  |
| Uzbekistan   | Uzbek Research Institute of Genetics and Plant Experimental Biology   |
| Uzbekistan   | Uzbek Research Institute of Horticulture, Viticulture and Wine-making |
| Uzbekistan   | Uzbek Research Institute of Plant Industry -- Kibray                  |
| Vietnam      | Hanoi Agricultural University                                         |
| Vietnam      | Hue University of Agriculture and Forestry                            |
| Vietnam      | Tay Nguyen University                                                 |
| Vietnam      | Vietnam Agricultural Science Institute (VASI)                         |
